# Supplementary material for: Emerging Role of Ubiquitin-Specific Protease 19 in Oncogenesis and Cancer Development
Source: Front Cell Dev Biol. 2022 May 12;10:889166. doi: 10.3389/fcell.2022.889166 (PMC9133600; doi:10.3389/fcell.2022.889166)
Supplement: Supplementary file 1 [file Table1.XLSX]

## Sheet: Hoja1
	USP19 expression prognosis	Isoform	Catalytic activity	Reference number
Clear cells renal cells carcinoma	better	cytoplasmic	unknown	[63, 65]
Serous ovarian carcinoma	better	unknown	unknown	[64]
Ewing sarcoma	worse	TM	required	[66]
Gastric cancer	worse	TM	unknown	[67]
Breast cancer	worse	TM	required	[68]
Colorectal carcinogenesis	worse	unknown	required	[69]
